# Supplementary material
Source: PubMed Central journal article supplement (PMC5571325)
Supplement: AAC.00694-17_zac009176532s1.pdf [file AAC.00694-17_zac009176532s1.pdf]

Figure S1

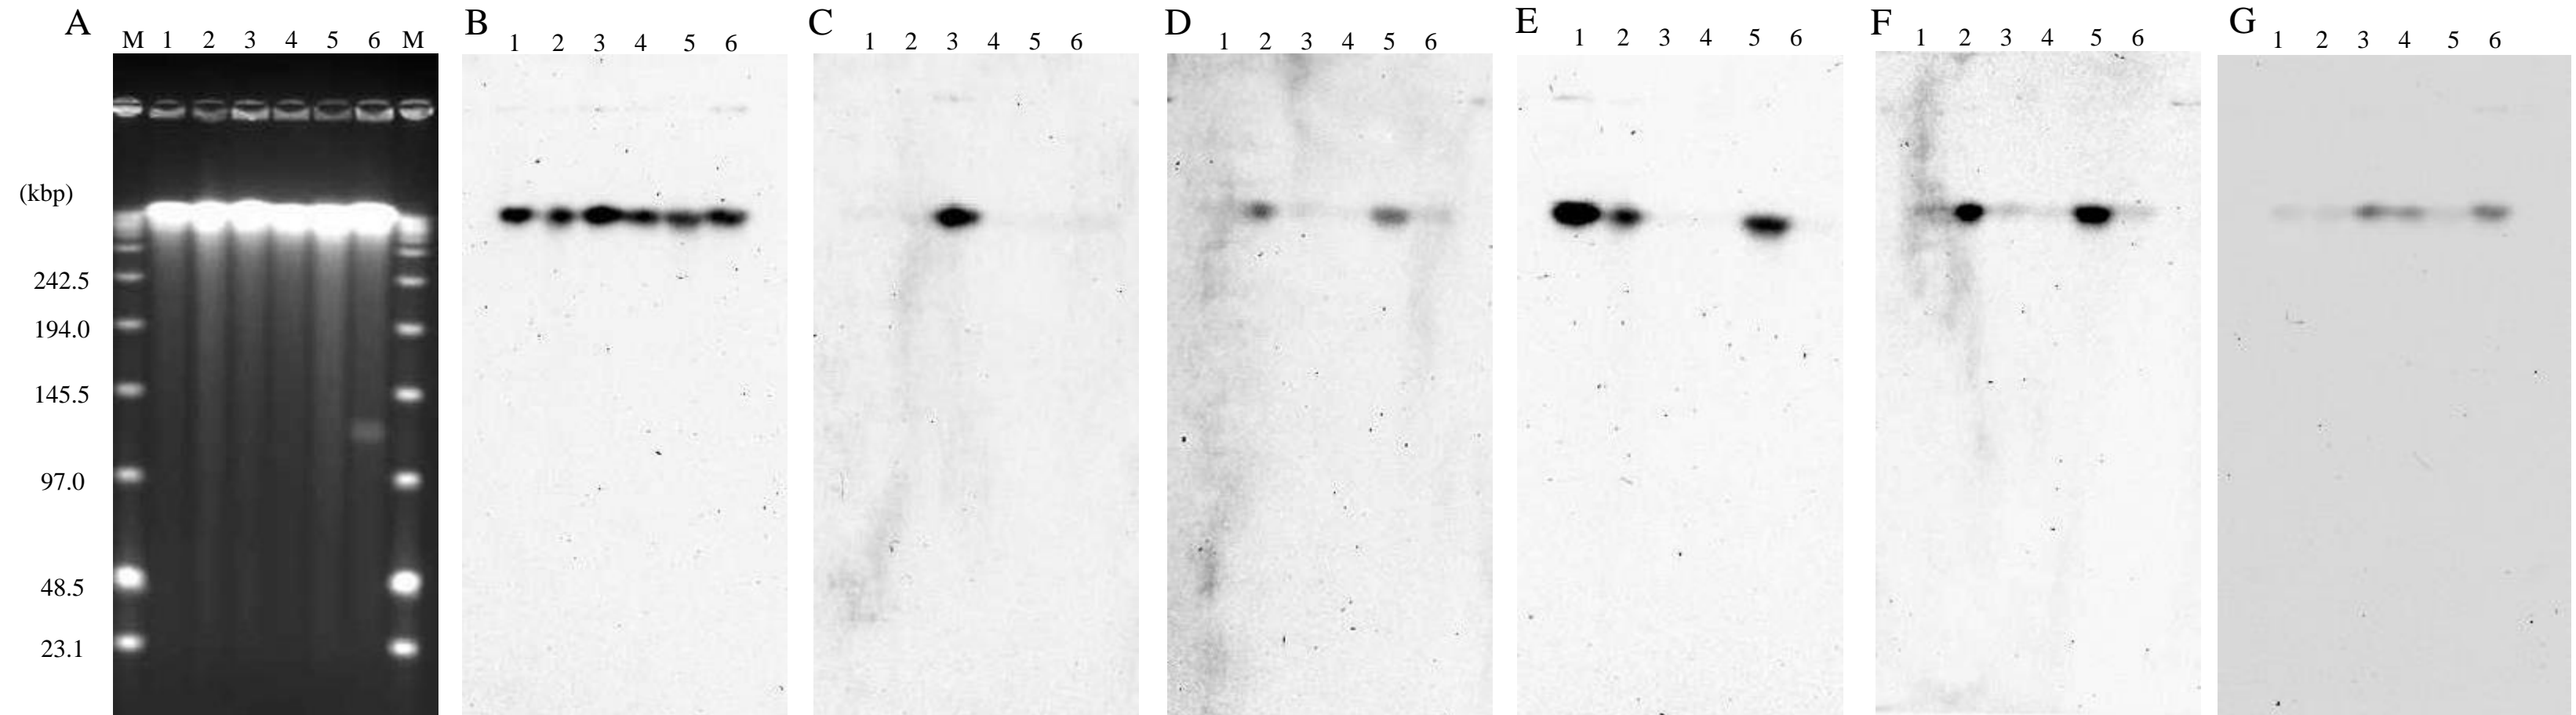

FIG. S1. Southern blot analysis with probes for genes encoding carbapenemases and 16S rRNA methyltransferases. Lane M, Low Range PFG Marker (New England Biolabs); Lane 1, IOMTU3; Lane 2, IOMTU9; Lane 3, IOMTU133; Lane 4, IOMTU184; Lane 5, IOMTU304; and Lane 6, IOMTU487. A, Pulsed-field gel electrophoresis patterns of S1 Nuclease-digested chromosomal DNAs stained with ethidium bromide; B, Southern hybridization with *P. aeruginosa* 16S rRNA probe; C, Southern hybridization with *bla*<sub>DIM-1</sub> probe; D, Southern hybridization with *bla*<sub>NDM-1</sub> probe; E, Southern hybridization with *bla*<sub>VIM-1</sub> probe; F, Southern hybridization with *rmtB* probe; G, Southern hybridization with *rmtF* probe.

Figure S2

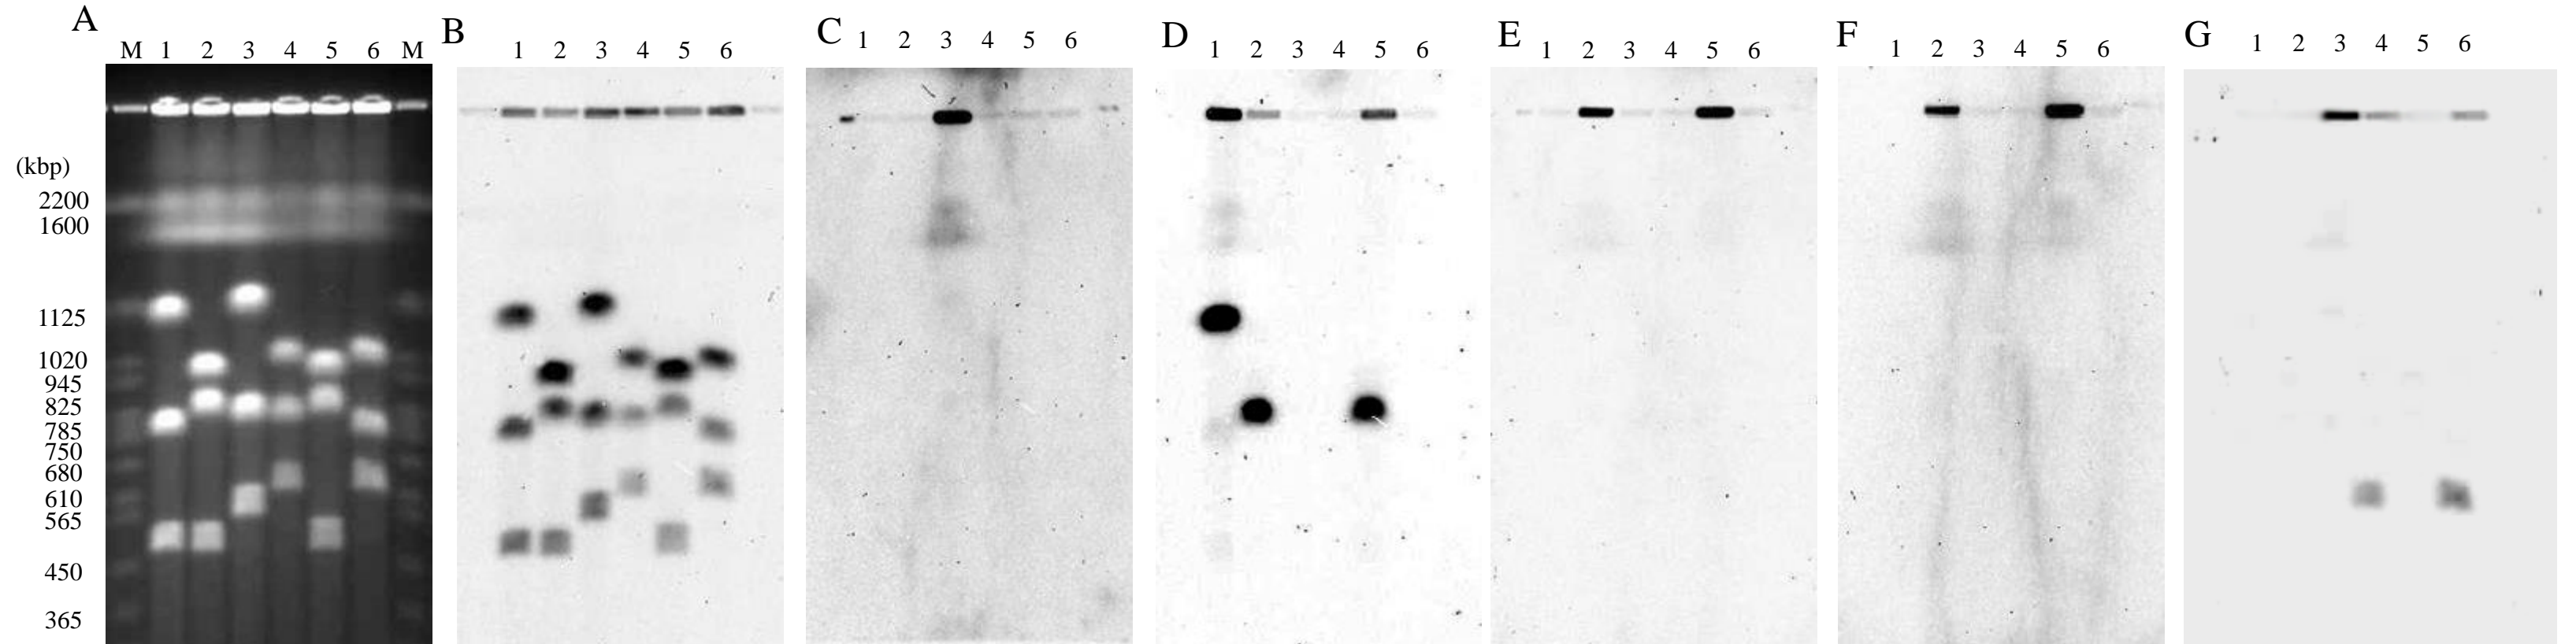

FIG. S2. Southern blot analysis with probes for genes encoding carbapenemases and 16S rRNA methyltransferases. Lane M, DNA size marker *Saccharomyces cerevisiae* (New England Biolabs); Lane 1, IOMTU3; Lane 2, IOMTU9; Lane 3, IOMTU133; Lane 4, IOMTU184; Lane 5, IOMTU304; and Lane 6, IOMTU487. A, Pulsed-field gel electrophoresis patterns of I-CeuI-digested chromosomal DNAs stained with ethidium bromide; B, Southern hybridization with *P. aeruginosa* 16S rRNA probe; C, Southern hybridization with *bla*<sub>DIM-1</sub> probe; D, Southern hybridization with *bla*<sub>NDM-1</sub> probe; E, Southern hybridization with *bla*<sub>VIM-1</sub> probe; F, Southern hybridization with *rmtB* probe; G, Southern hybridization with *rmtF* probe.
